# Supplementary material for: The shielding cone in spherical aromatic structures: insights from models for spherical 2(N + 1)2 aromatic fullerenes
Source: Royal Society of Chemistry journal article supplement (doi:10.1039/c7cp01870c), 2017-01-01
Supplement: c7cp01870c1.pdf [file c7cp01870c1.pdf]

# Shielding Cone in Spherical Aromatic Structures. Insights from Models for Spherical $2(N+1)^2$ Aromatic Fullerenes

Alvaro Muñoz-Castro

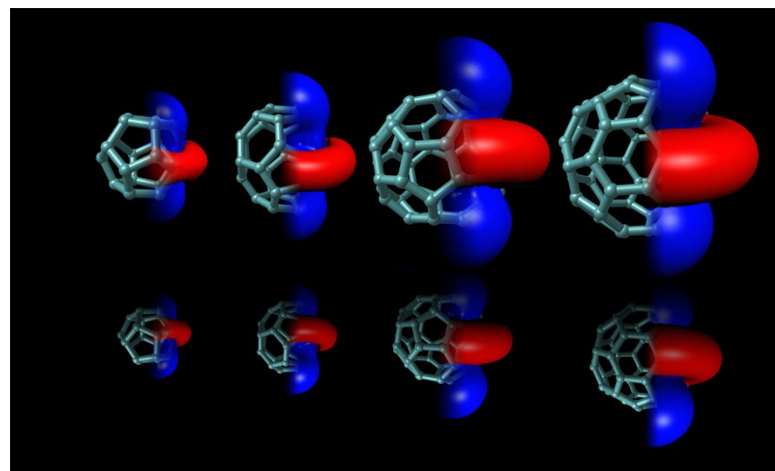

## Content

**Figure S1.** Induced magnetic field of  $C_{60}^{10+}$  under different orientation of the applied field.

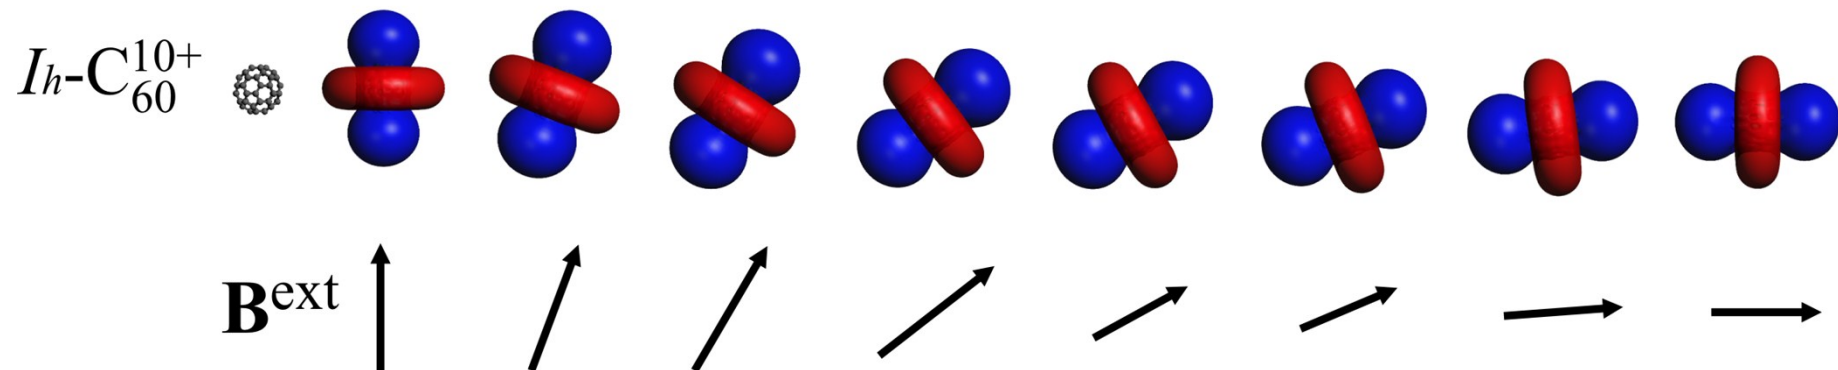

**Figure S1.** Induced magnetic field of  $C_{60}^{10+}$  under different orientation of the applied field.
